# Supplementary material for: Breast Cancer Subtype Specific Classifiers of Response to Neoadjuvant Chemotherapy Do Not Outperform Classifiers Trained on All Subtypes
Source: PLoS One. 2014 Feb 18;9(2):e88551. doi: 10.1371/journal.pone.0088551 (PMC3928239; doi:10.1371/journal.pone.0088551)
Supplement: Table S2 — AUC values for the models that were included in the analysis. Each tab of the excel file describes a different set of models. The different models are in the rows and the different subtypes are next to each other. (XLSX) [file pone.0088551.s005.xlsx]

## Sheet: affyst_subtype_(clinicalData)
	Her2+ (n=80)										Her2 en ER - (n=43)										TN (n=103)										LUM (n=196)										LumA (n= 148)
	Scores										Scores						Features				Scores						Features				Scores						Features				Scores						Features
	AUC	AUC-confidence	ACC	ACC-confidence	ACC-Pos	ACC-Neg	# selected	Stability outer loop	Stability inner loop		AUC	AUC-confidence	ACC	ACC-confidence	ACC-Pos	ACC-Neg	# selected	Stability outer loop	Stability inner loop		AUC	AUC-confidence	ACC	ACC-confidence	ACC-Pos	ACC-Neg	# selected	Stability outer loop	Stability inner loop		AUC	AUC-confidence	ACC	ACC-confidence	ACC-Pos	ACC-Neg	# selected	Stability outer loop	Stability inner loop		AUC	AUC-confidence	ACC	ACC-confidence	ACC-Pos	ACC-Neg	# selected	Stability outer loop	Stability inner loop
J48	0.639359	0.6216 0.6571	0.63672	0.6242 0.6492	0.526667	0.702124					0.488922	0.4664 0.5114	0.487407	0.4641 0.5107	0.644444	0.293651					0.48736	0.4788 0.4959	0.563305	0.5501 0.5765	0.159707	0.817989					0.5	0.5 0.5	0.938772	0.9387 0.9388	0	1					0.498272	0.4978 0.4988	0.917098	0.9164 0.9178	0	0.998025
Knn + Inf. Gain.	0.673713	0.6542 - 0.6933	0.645679	0.6302 - 0.6611	0.517778	0.721569	2.95556	0.515721	0.463314		0.541898	0.506 - 0.5778	0.528783	0.4976 - 0.5599	0.675	0.346032	2.33333	0.677056	0.663051		0.526534	0.5113 - 0.5417	0.562446	0.5501 - 0.5748	0.309646	0.722751	2.33333	0.801732	0.695888		0.418928	0.3998 - 0.4381	0.938772	0.9387 - 0.9388	0	1	1.6	0.324495	0.307031		0.477304	0.4608 - 0.4938	0.915728	0.9142 - 0.9172	0.0111111	0.995556	4.35556	0.831633	0.788905
Knn + CFS	0.675817	0.6587 - 0.693	0.655904	0.6404 - 0.6714	0.611111	0.681536	3.02222	0.169118	0.142756		0.597454	0.5637 - 0.6312	0.551323	0.5197 - 0.5829	0.775	0.267725	1.24444	0.0202922	0.0230041		0.525391	0.5107 - 0.5401	0.56577	0.5529 - 0.5786	0.234432	0.775661	1.86667	0.0221861	0.0181292		0.437535	0.422 - 0.4531	0.938772	0.9387 - 0.9388	0	1	1.42222	0.0326705	0.0241932		0.509721	0.4903 - 0.5292	0.91483	0.9136 - 0.9161	0	0.995556	2.08889	0.110251	0.0857882
Knn + Relief	0.644293	0.6275 - 0.6611	0.638778	0.6244 - 0.6531	0.508889	0.716013	3.53333	0.596055	0.556424		0.477546	0.4391 - 0.516	0.499153	0.4665 - 0.5318	0.575	0.403704	4.91111	0.609831	0.598988		0.477964	0.4641 - 0.4918	0.528889	0.5168 - 0.5409	0.273871	0.689947	3.55556	0.47983	0.459193		0.487365	0.4703 - 0.5044	0.938772	0.9387 - 0.9388	0	1	1.26667	0.385965	0.427355		0.482012	0.4643 - 0.4997	0.914376	0.9125 - 0.9162	0.0111111	0.994085	4.11111	0.853317	0.825634
Lreg + Inf. Gain.	0.698064	0.6823 - 0.7138	0.662393	0.6513 - 0.6735	0.591111	0.704493	3.04444	0.777372	0.785313		0.567493	0.5296 - 0.6054	0.540317	0.5122 - 0.5685	0.686111	0.354497	1.75556	0.544304	0.486033		0.563323	0.5466 - 0.5801	0.587899	0.5785 - 0.5973	0.380952	0.719577	2.97778	0.628223	0.545285		0.55173	0.5358 - 0.5677	0.93639	0.9358 - 0.937	0	0.997462	2.4	0.833333	0.755123		0.583579	0.5661 - 0.6011	0.905778	0.9016 - 0.91	0.0611111	0.980333	3.8	0.570175	0.541273
Lreg + CFS	0.695752	0.6786 - 0.713	0.667363	0.6546 - 0.6801	0.64	0.682761	2.86667	0.059549	0.0678965		0.59666	0.5585 - 0.6348	0.576296	0.5516 - 0.601	0.783333	0.310582	1.11111	0.0227273	0.0257646		0.541697	0.5256 - 0.5578	0.57619	0.5636 - 0.5888	0.310012	0.744974	2.02222	0.0894106	0.0852143		0.530011	0.5141 - 0.5459	0.938772	0.9387 - 0.9388	0	1	1.8	0.0258137	0.0191157		0.556534	0.5427 - 0.5704	0.91395	0.9126 - 0.9153	0.0166667	0.99314	2.31111	0.0996503	0.0775394
Lreg + Relief	0.673587	0.6605 - 0.6867	0.642324	0.6297 - 0.655	0.586667	0.675082	4.15556	0.696889	0.706886		0.432937	0.4056 - 0.4603	0.479048	0.4548 - 0.5033	0.672222	0.234392	3.48889	0.572669	0.503003		0.589447	0.5731 - 0.6058	0.586611	0.574 - 0.5992	0.368987	0.72381	4.97778	0.577719	0.561169		0.556902	0.5428 - 0.571	0.93639	0.9358 - 0.937	0	0.997462	2.11111	0.947368	0.877285		0.583455	0.5696 - 0.5973	0.90624	0.9017 - 0.9108	0.0777778	0.979377	4	0.87702	0.848568
Naive Bayes + Inf. Gain.	0.729281	0.7142 - 0.7443	0.674834	0.6598 - 0.6899	0.617778	0.708497	3.93333	0.601695	0.607841		0.548909	0.5184 - 0.5794	0.526032	0.4982 - 0.5539	0.711111	0.293122	1.91111	0.5	0.446473		0.557384	0.5409 - 0.5738	0.581587	0.5688 - 0.5943	0.352381	0.726984	3.35556	0.89404	0.875119		0.509295	0.4903 - 0.5283	0.93843	0.9383 - 0.9386	0	0.999636	3.04444	0.985401	0.985401		0.641273	0.6205 - 0.662	0.913878	0.9097 - 0.9181	0.155556	0.980816	5.44444	0.918367	0.916196
Naive Bayes + CFS	0.709604	0.6923 - 0.7269	0.678063	0.6623 - 0.6938	0.664444	0.685458	3.02222	0.169118	0.142756		0.592857	0.5621 - 0.6236	0.55418	0.5291 - 0.5793	0.8	0.243915	1.15556	0.0218531	0.0247736		0.533639	0.5193 - 0.548	0.574211	0.5624 - 0.586	0.260928	0.772487	2.04444	0.0884387	0.084288		0.526426	0.5088 - 0.5441	0.938772	0.9387 - 0.9388	0	1	1.88889	0.0245989	0.0182161		0.560907	0.5434 - 0.5784	0.912562	0.9103 - 0.9148	0.05	0.988706	3.02222	0.159759	0.139729
Naive Bayes + Relief	0.731099	0.7137 - 0.7485	0.674802	0.6618 - 0.6878	0.655556	0.686029	4.97778	0.581778	0.590124		0.430919	0.3991 - 0.4628	0.495238	0.4717 - 0.5188	0.733333	0.19418	3.13333	0.637653	0.560082		0.571844	0.5588 - 0.5849	0.576228	0.5656 - 0.5869	0.302808	0.749206	5.2	0.828866	0.828995		0.506936	0.4901 - 0.5238	0.93843	0.9383 - 0.9386	0	0.999636	2.64444	0.756303	0.700353		0.639722	0.6158 - 0.6637	0.914766	0.9106 - 0.919	0.166667	0.980816	5.44444	0.806679	0.862087
Nearest Mean + Inf. Gain.	0.677002	0.6516 - 0.7024	0.629725	0.5998 - 0.6596	0.866667	0.487337	2.2	0.692837	0.622432		0.558664	0.5243 - 0.593	0.583386	0.5489 - 0.6178	0.752778	0.36455	1.4	0.68254	0.60947		0.610908	0.5894 - 0.6325	0.567638	0.543 - 0.5922	0.801709	0.420106	2.08889	0.895551	0.777322		0.535913	0.52 - 0.5518	0.284631	0.244 - 0.3252	0.822222	0.249603	2.17778	0.918367	0.832177		0.53258	0.5184 - 0.5468	0.562794	0.5205 - 0.6051	0.498889	0.566271	2.53333	0.374003	0.3721
Nearest Mean + CFS	0.645882	0.6244 - 0.6674	0.595505	0.5664 - 0.6246	0.846667	0.445098	2.37778	0.0717927	0.0818566		0.560979	0.5288 - 0.5932	0.59291	0.5609 - 0.6249	0.805556	0.316402	1.17778	0.0214408	0.0243062		0.618559	0.5917 - 0.6455	0.58267	0.5531 - 0.6123	0.776801	0.460317	1.71111	0.0242031	0.0197773		0.538488	0.522 - 0.555	0.274882	0.2349 - 0.3148	0.838889	0.238087	1.55556	0.0298701	0.0221195		0.537225	0.5281 - 0.5463	0.674904	0.6405 - 0.7093	0.382222	0.692227	1.28889	0.0360502	0.0262014
Nearst Mean + Relief	0.671136	0.6458 - 0.6965	0.615701	0.583 - 0.6484	0.893333	0.448938	2.71111	0.435544	0.461314		0.468849	0.4355 - 0.5022	0.475026	0.4388 - 0.5112	0.525	0.412698	3.37778	0.591507	0.519549		0.595706	0.573 - 0.6184	0.532586	0.5062 - 0.559	0.879243	0.312169	4.28889	0.670513	0.651305		0.525605	0.5119 - 0.5393	0.299451	0.2598 - 0.3391	0.783333	0.267877	2.2	0.909091	0.841839		0.561574	0.5432 - 0.5799	0.351114	0.3137 - 0.3885	0.8	0.323148	2.11111	0.90622	0.761224
SVM + Inf. Gain.	0.712602	0.6995 - 0.7257	0.654258	0.641 - 0.6676	0.606667	0.682598	3.66667	0.645455	0.652048		0.53039	0.4976 - 0.5632	0.536825	0.5047 - 0.569	0.705556	0.324339	1.84444	0.518072	0.46261		0.576327	0.5622 - 0.5905	0.569188	0.5565 - 0.5819	0.385592	0.684656	3.48889	0.859873	0.841675		0.498934	0.4828 - 0.5151	0.937752	0.9374 - 0.9381	0	0.998913	2.86667	0.697674	0.632196		0.538823	0.5194 - 0.5583	0.906249	0.9029 - 0.9096	0.0277778	0.983779	4.48889	0.806931	0.765472
SVM + CFS	0.688321	0.6758 - 0.7008	0.657582	0.6449 - 0.6702	0.646667	0.663235	3.08889	0.165468	0.139675		0.536144	0.5101 - 0.5622	0.557037	0.5306 - 0.5835	0.758333	0.304233	1.33333	0.0189394	0.0214705		0.560527	0.5451 - 0.5759	0.560093	0.5478 - 0.5724	0.289621	0.731217	2.22222	0.0813636	0.077545		0.493238	0.48 - 0.5064	0.938089	0.9378 - 0.9383	0	0.999271	1.73333	0.0268065	0.0198509		0.519761	0.5127 - 0.5268	0.918467	0.9182 - 0.9187	0	0.999517	2.28889	0.100618	0.0782922
SVM + Relief	0.695225	0.6818 - 0.7087	0.650807	0.6396 - 0.662	0.608889	0.675572	5.08889	0.837435	0.850265		0.473347	0.4435 - 0.5032	0.508889	0.4838 - 0.534	0.747222	0.207937	3.84444	0.519706	0.456483		0.589613	0.5747 - 0.6045	0.568441	0.5568 - 0.5801	0.348962	0.706878	5.55556	0.775818	0.775939		0.493778	0.4802 - 0.5073	0.937752	0.9374 - 0.9381	0	0.998913	2.75556	0.725806	0.672113		0.534249	0.5164 - 0.5521	0.899946	0.8954 - 0.9045	0.0222222	0.977402	4.15556	0.844191	0.816803
Average	0.685046		0.648777		0.649306	0.647896	3.3763	0.467722			0.525248		0.530741		0.709375	0.304497					0.557889		0.567735		0.402228	0.672421	3.17926				0.506943		0.815927		0.152778	0.859179	2.09778				0.547312		0.840168		0.142569	0.901797	3.42963
max	0.731099		0.678063		0.893333	0.721569	5.08889				0.597454		0.59291		0.805556						0.618559		0.587899		0.879243	0.817989					0.556902		0.938772		0.838889	1					0.641273		0.918467		0.8	0.999517
Balance outcome	pCR				RD						pCR		RD								pCR		RD								pCR		RD								pCR				RD
	30				50						24		19								40		63								12		184								12				136
	0.375				0.625						0.55814		0.44186								0.38835		0.61165								0.0612245		0.938776								0.0810811				0.918919

## Sheet: affyst_all_(clinicalData)
	Her2+ (n=80)										Her2 en ER - (n=43)										TN (n=103)										LUM (n=196)										LumA (n= 148)
	Scores						Features				Scores						Features				Scores						Features				Scores						Features				Scores						Features
	AUC	AUC-confidence	ACC	ACC-confidence	ACC-Pos	ACC-Neg	# selected	Stability outer loop	Stability inner loop		AUC	AUC-confidence	ACC	ACC-confidence	ACC-Pos	ACC-Neg	# selected	Stability outer loop	Stability inner loop		AUC	AUC-confidence	ACC	ACC-confidence	ACC-Pos	ACC-Neg	# selected	Stability outer loop	Stability inner loop		AUC	AUC-confidence	ACC	ACC-confidence	ACC-Pos	ACC-Neg	# selected	Stability outer loop	Stability inner loop		AUC	AUC-confidence	ACC	ACC-confidence	ACC-Pos	ACC-Neg	# selected	Stability outer loop	Stability inner loop
J48	0.60607	0.5834 - 0.6288	0.614639	0.601 - 0.6283	0.389018	0.766963					0.482738	0.4537 - 0.5117	0.422218	0.3923 - 0.4521	0.515426	0.426737					0.50482	0.4965 - 0.5132	0.565597	0.5519 - 0.5793	0.225999	0.787793					0.5	0.5 - 0.5	0.938806	0.937 - 0.9407	0	1					0.592749	0.5733 - 0.6122	0.910158	0.9052 - 0.9152	0.132487	0.978288
Knn + Inf. Gain.	0.673051	0.6512 - 0.6949	0.618887	0.6044 - 0.6334	0.215141	0.872082					0.457346	0.4275 - 0.4872	0.428016	0.3958 - 0.4603	0.283675	0.683951					0.525095	0.5125 - 0.5377	0.586332	0.5726 - 0.6001	0.138028	0.879366					0.441265	0.4282 - 0.4543	0.938806	0.937 - 0.9407	0	1					0.563571	0.5371 - 0.5901	0.909335	0.9039 - 0.9148	0.0663492	0.984464
Knn + CFS	0.704829	0.6857 - 0.7239	0.6305	0.6176 - 0.6434	0.0480159	0.982935					0.49213	0.4866 - 0.4976	0.449969	0.4149 - 0.485	0.0527778	0.943333					0.501876	0.5003 - 0.5035	0.603297	0.5914 - 0.6152	0.0148148	0.984127					0.493428	0.4901 - 0.4968	0.938806	0.937 - 0.9407	0	1					0.608576	0.5853 - 0.6318	0.917241	0.9129 - 0.9215	0.00555556	0.997613
Knn + Relief	0.64397	0.6242 - 0.6637	0.614631	0.6002 - 0.6291	0.308696	0.807513					0.437642	0.393 - 0.4822	0.426905	0.3888 - 0.4651	0.39079	0.52411					0.524995	0.5083 - 0.5417	0.566979	0.5537 - 0.5803	0.367223	0.698247					0.401228	0.3848 - 0.4176	0.936494	0.9345 - 0.9385	0	0.997541					0.53275	0.5051 - 0.5604	0.898363	0.8935 - 0.9032	0.129947	0.965788
Lreg + Inf. Gain.	0.699492	0.6777 - 0.7213	0.627554	0.6097 - 0.6454	0.381958	0.786637					0.46718	0.42 - 0.5144	0.446452	0.4116 - 0.4813	0.481676	0.459551					0.548219	0.5347 - 0.5617	0.585519	0.5746 - 0.5964	0.185353	0.852313					0.525482	0.5089 - 0.542	0.938469	0.9367 - 0.9403	0	0.999647					0.619087	0.5966 - 0.6416	0.912501	0.9071 - 0.9179	0.128254	0.981442
Lreg + CFS	0.705867	0.6867 - 0.725	0.631389	0.6183 - 0.6445	0.0719841	0.97343					0.494352	0.49 - 0.4987	0.451989	0.4166 - 0.4874	0.082037	0.910741					0.499618	0.4976 - 0.5016	0.603297	0.5914 - 0.6152	0.00987654	0.986243					0.492351	0.4885 - 0.4962	0.938806	0.937 - 0.9407	0	1					0.620665	0.6014 - 0.6399	0.916778	0.9124 - 0.9212	0.00555556	0.997097
Lreg + Relief	0.704916	0.6819 - 0.728	0.650967	0.6329 - 0.6691	0.541669	0.724989					0.491396	0.4374 - 0.5454	0.496422	0.4627 - 0.5302	0.680717	0.294489					0.589349	0.573 - 0.6057	0.596028	0.5852 - 0.6068	0.308663	0.78927					0.578287	0.5587 - 0.5978	0.937825	0.936 - 0.9396	0	0.998964					0.641383	0.6138 - 0.6689	0.913567	0.9075 - 0.9196	0.201799	0.975439
Naive Bayes + Inf. Gain.	0.693941	0.6715 - 0.7164	0.676581	0.6559 - 0.6973	0.747524	0.639043					0.439552	0.3882 - 0.4909	0.547404	0.5123 - 0.5825	0.938596	0.0647443					0.627441	0.6103 - 0.6446	0.576996	0.5615 - 0.5925	0.676821	0.519202					0.570697	0.552 - 0.5894	0.938806	0.937 - 0.9407	0	1					0.669148	0.6439 - 0.6944	0.903166	0.8971 - 0.9093	0.222169	0.962403
Naive Bayes + CFS	0.706111	0.6869 - 0.7253	0.634969	0.6202 - 0.6497	0.117388	0.954015					0.494352	0.49 - 0.4987	0.458307	0.4226 - 0.494	0.133889	0.858889					0.499618	0.4976 - 0.5016	0.595531	0.5813 - 0.6097	0.0716429	0.930074					0.492988	0.4893 - 0.4967	0.938806	0.937 - 0.9407	0	1					0.621889	0.602 - 0.6418	0.913636	0.9087 - 0.9186	0.0222222	0.992206
Naive Bayes + Relief	0.696014	0.6735 - 0.7185	0.678394	0.6578 - 0.699	0.755503	0.634929					0.44202	0.3928 - 0.4913	0.552831	0.5163 - 0.5894	0.948252	0.0602998					0.640276	0.622 - 0.6586	0.582056	0.5662 - 0.5979	0.675217	0.529563					0.578786	0.5611 - 0.5964	0.938806	0.937 - 0.9407	0	1					0.671033	0.6463 - 0.6957	0.902273	0.8961 - 0.9084	0.227725	0.96095
Nearest Mean + Inf. Gain.	0.676371	0.6518 - 0.7009	0.607908	0.5741 - 0.6418	0.936106	0.416636					0.5	0.5 - 0.5	0.560053	0.524 - 0.5961	1	0					0.577782	0.5619 - 0.5936	0.48622	0.4612 - 0.5113	0.984356	0.171208					0.615886	0.5983 - 0.6335	0.948605	0.9462 - 0.951	0.236667	0.995105					0.692574	0.6656 - 0.7196	0.84883	0.8359 - 0.8618	0.504709	0.880439
Nearest Mean + CFS	0.690958	0.6734 - 0.7086	0.664395	0.6453 - 0.6835	0.794266	0.587651					0.5	0.5 - 0.5	0.560053	0.524 - 0.5961	1	0					0.49969	0.4996 - 0.4998	0.390036	0.3785 - 0.4016	0.994352	0.00502762					0.498974	0.4987 - 0.4992	0.936874	0.9347 - 0.939	0	0.997949					0.615161	0.5943 - 0.636	0.868217	0.8608 - 0.8756	0.314444	0.915877
Nearst Mean + Relief	0.674991	0.6538 - 0.6962	0.608403	0.5823 - 0.6345	0.943958	0.406024					0.5	0.5 - 0.5	0.560053	0.524 - 0.5961	1	0					0.570486	0.5554 - 0.5855	0.477953	0.4536 - 0.5023	0.988523	0.152449					0.689821	0.6644 - 0.7152	0.929266	0.9229 - 0.9357	0.416667	0.962976					0.703557	0.6777 - 0.7294	0.807177	0.7842 - 0.8301	0.578413	0.8287
SVM + Inf. Gain.	0.675115	0.6544 - 0.6958	0.638085	0.6228 - 0.6534	0.44501	0.759292					0.487834	0.4395 - 0.5362	0.487056	0.4546 - 0.5195	0.560414	0.421126					0.573201	0.5549 - 0.5915	0.589033	0.5772 - 0.6008	0.219478	0.837388					0.572585	0.5545 - 0.5907	0.938125	0.9363 - 0.9399	0	0.999281					0.637251	0.6086 - 0.6659	0.911808	0.9059 - 0.9177	0.19619	0.974436
SVM + CFS	0.503322	0.5016 - 0.5051	0.622965	0.612 - 0.6339	0.0269841	0.983761					0.5	0.4969 - 0.5031	0.442561	0.4078 - 0.4773	0.0314815	0.964444					0.495006	0.4933 - 0.4967	0.603297	0.5914 - 0.6152	0.00987654	0.986243					0.504611	0.5034 - 0.5059	0.938806	0.937 - 0.9407	0	1					0.500266	0.4985 - 0.502	0.91635	0.9121 - 0.9206	0	0.997178
SVM + Relief	0.677047	0.6533 - 0.7008	0.641492	0.6232 - 0.6598	0.451171	0.765478					0.488198	0.434 - 0.5424	0.490094	0.4522 - 0.528	0.571268	0.416329					0.578235	0.5622 - 0.5943	0.591924	0.5815 - 0.6024	0.228875	0.83581					0.567321	0.5483 - 0.5863	0.937789	0.9361 - 0.9395	0	0.998929					0.634971	0.6058 - 0.6641	0.910446	0.9046 - 0.9163	0.184921	0.973591
Average	0.670754		0.63511		0.4484	0.753836	#DIV/0!				0.479671		0.486274		0.541937	0.439297	#DIV/0!				0.547232		0.562506		0.381194	0.68402	#DIV/0!				0.532732		0.938368		0.0408333	0.9969	#DIV/0!				0.620289		0.89749		0.182546	0.960369	#DIV/0!
max	0.706111		0.678394		0.943958	0.983761					0.5		0.560053		1	0.964444					0.640276		0.603297		0.994352	0.986243					0.689821		0.948605		0.416667	1					0.703557		0.917241		0.578413	0.997613
Balance outcome	pCR		RD								pCR		RD								pCR		RD								pCR		RD								pCR		RD
	50		88								38		36								64		109								14		308								16		226
	0.362319		0.637681								0.513514		0.486486								0.369942		0.630058								0.0434783		0.956522								0.0661157		0.933884

## Sheet: affyst_subtype_(exprsData)
	Her2+ (n=82)										Her2 en ER - (n=45)										TN (n=113)										LUM (n=199)										LumA (n= 149)
	Scores						Features				Scores						Features				Scores						Features				Scores						Features				Scores						Features
	AUC	AUC-confidence	ACC	ACC-confidence	ACC-Pos	ACC-Neg	# selected	Stability outer loop	Stability inner loop		AUC	AUC-confidence	ACC	ACC-confidence	ACC-Pos	ACC-Neg	# selected	Stability outer loop	Stability inner loop		AUC	AUC-confidence	ACC	ACC-confidence	ACC-Pos	ACC-Neg	# selected	Stability outer loop	Stability inner loop		AUC	AUC-confidence	ACC	ACC-confidence	ACC-Pos	ACC-Neg	# selected	Stability outer loop	Stability inner loop		AUC	AUC-confidence	ACC	ACC-confidence	ACC-Pos	ACC-Neg	# selected	Stability outer loop	Stability inner loop
J48	0.531254	0.53 0.5325	0.545414	0.5443 0.5465	0.471919	0.589542					0.460042	0.458 0.4621	0.468783	0.4666 0.4709	0.541975	0.378307					0.534849	0.5334 0.5363	0.55761	0.5564 0.5588	0.463492	0.613607					0.493468	0.4922 0.4947	0.860286	0.8597 0.8609	0.09	0.918838					0.499901	0.4983 0.5015	0.829192	0.8285 0.8299	0.0944444	0.899109
Knn + WMW	0.660333	0.6588 - 0.6618	0.638624	0.6373 - 0.6399	0.556364	0.688889	67.3333	0.30444	0.138932		0.466332	0.4645 - 0.4682	0.499193	0.4973 - 0.501	0.641358	0.320106	46.8889	0.160513	0.0451472		0.616638	0.6149 - 0.6183	0.627817	0.6266 - 0.6291	0.431746	0.743841	74	0.26896	0.102019		0.503679	0.5025 - 0.5048	0.915635	0.9153 - 0.916	0	0.98484	58.4444	0.231403	0.0809442		0.505079	0.5039 - 0.5062	0.89761	0.8972 - 0.898	0.0255556	0.980945	49.5556	0.192927	0.0569055
Knn + WMW (uncor)	0.654581	0.6531 - 0.6561	0.645062	0.6438 - 0.6463	0.562828	0.695425	62.4444	0.252346	0.0819591		0.44853	0.4467 - 0.4503	0.473479	0.472 - 0.475	0.608951	0.303704	50.8889	0.168043	0.0448045		0.606674	0.6052 - 0.6082	0.622001	0.6208 - 0.6232	0.433333	0.733696	73.7778	0.26784	0.0983162		0.512238	0.5107 - 0.5137	0.914955	0.9146 - 0.9153	0.00888889	0.983424	44.8889	0.166292	0.0520039		0.514176	0.5124 - 0.5159	0.898988	0.8986 - 0.8994	0.0155556	0.983403	51.3333	0.197029	0.0602586
Knn + ratio SumSq.	0.632068	0.6307 - 0.6335	0.637331	0.636 - 0.6387	0.470707	0.738562	55.3333	0.241986	0.109316		0.432705	0.4307 - 0.4347	0.485847	0.4838 - 0.4879	0.655556	0.274603	56.8889	0.185067	0.0554285		0.605967	0.6043 - 0.6076	0.619361	0.6182 - 0.6205	0.365079	0.769887	47.3333	0.172941	0.0704475		0.525835	0.5247 - 0.527	0.922946	0.9227 - 0.9232	0.0111111	0.992032	36.4444	0.142517	0.0652928		0.524387	0.5234 - 0.5254	0.910627	0.9104 - 0.9108	0.0188889	0.995631	43.1111	0.16783	0.0771212
Lreg + WMW	0.57041	0.569 - 0.5719	0.566843	0.5655 - 0.5682	0.463636	0.630065	43.1111	0.201406	0.0880014		0.478649	0.4765 - 0.4808	0.498651	0.4969 - 0.5004	0.551852	0.430688	52	0.185334	0.052519		0.615665	0.6141 - 0.6173	0.597914	0.5966 - 0.5992	0.490476	0.661272	60.2222	0.219155	0.0809849		0.528144	0.5263 - 0.53	0.861546	0.861 - 0.862	0.1	0.919578	52.8889	0.205768	0.0714214		0.499794	0.4974 - 0.5022	0.802259	0.8013 - 0.8032	0.08	0.871583	50.2222	0.19817	0.0587402
Lreg + WMW uncor.	0.606292	0.6045 - 0.6081	0.602587	0.6011 - 0.6041	0.513939	0.656209	45.7778	0.184223	0.0577735		0.461196	0.4594 - 0.463	0.493968	0.4922 - 0.4957	0.533333	0.443386	52.6667	0.176007	0.0470895		0.616799	0.615 - 0.6186	0.622728	0.6212 - 0.6242	0.498413	0.696055	70.6667	0.258248	0.0944723		0.520858	0.5193 - 0.5224	0.855	0.8543 - 0.8557	0.111111	0.911376	73.7778	0.277013	0.0887421		0.556757	0.5548 - 0.5587	0.824613	0.8239 - 0.8253	0.102222	0.893688	65.7778	0.248449	0.0778212
Lreg + ratio SumSq.	0.570856	0.5692 - 0.5725	0.574956	0.5737 - 0.5762	0.477172	0.633987	57.7778	0.248007	0.112707		0.443493	0.4412 - 0.4458	0.462275	0.4606 - 0.464	0.496914	0.417989	60.2222	0.200889	0.0605554		0.649652	0.6479 - 0.6514	0.625494	0.624 - 0.627	0.473016	0.71562	63.1111	0.234779	0.0969025		0.535586	0.534 - 0.5372	0.850495	0.8499 - 0.8511	0.103333	0.906957	54.4444	0.219889	0.100147		0.506885	0.505 - 0.5087	0.820068	0.8192 - 0.821	0.12	0.887193	26.2222	0.0959938	0.0456157
Naive Bayes + WMW	0.693583	0.6925 - 0.6947	0.651499	0.6502 - 0.6528	0.525657	0.728105	31.3333	0.143166	0.062052		0.505287	0.5034 - 0.5072	0.48918	0.4875 - 0.4909	0.586111	0.36455	57.5556	0.201018	0.0576933		0.606776	0.6053 - 0.6082	0.613861	0.6124 - 0.6154	0.496825	0.682931	56.2222	0.205498	0.0752753		0.574734	0.5725 - 0.5769	0.86601	0.8654 - 0.8666	0.151111	0.920365	34.4444	0.130938	0.0461443		0.513863	0.5121 - 0.5156	0.858507	0.8578 - 0.8592	0.102222	0.9308	51.5556	0.200431	0.0599509
Naive Bayes + WMW uncor.	0.678176	0.6769 - 0.6794	0.647237	0.6458 - 0.6486	0.547475	0.708497	34.8889	0.135553	0.0425156		0.481397	0.4791 - 0.4836	0.475106	0.473 - 0.4772	0.584877	0.33545	72.2222	0.246713	0.0671704		0.606998	0.6056 - 0.6084	0.614414	0.613 - 0.6158	0.495238	0.684702	57.5556	0.211565	0.0756775		0.582244	0.5803 - 0.5842	0.868955	0.8684 - 0.8695	0.136667	0.924631	29.5556	0.103418	0.033083		0.528525	0.5263 - 0.5307	0.861371	0.8606 - 0.8621	0.08	0.936264	47.5556	0.17963	0.0548951
Naive Bayes + ratio SumSq.	0.691794	0.6904 - 0.6932	0.634979	0.6336 - 0.6364	0.569293	0.67451	32.8889	0.136057	0.0604229		0.448225	0.4453 - 0.4512	0.448148	0.4463 - 0.45	0.453395	0.445503	58.2222	0.194101	0.0584529		0.657366	0.6556 - 0.6591	0.634503	0.6331 - 0.6359	0.54127	0.689452	30.4444	0.104346	0.043133		0.542901	0.5405 - 0.5453	0.710795	0.7091 - 0.7125	0.275556	0.74371	46.4444	0.187408	0.0846299		0.486764	0.4851 - 0.4884	0.709958	0.708 - 0.7119	0.193333	0.759871	45.7778	0.174228	0.0798408
Nearest Mean + WMW	0.530291	0.5291 - 0.5315	0.449148	0.4473 - 0.451	0.855354	0.205229	56	0.177597	0.111076		0.489793	0.4878 - 0.4918	0.48082	0.4786 - 0.483	0.481173	0.498413	53.7778	0.165327	0.0500485		0.612066	0.6109 - 0.6133	0.626268	0.6251 - 0.6275	0.557143	0.666989	91.5556	0.323842	0.126702		0.609241	0.6074 - 0.611	0.391955	0.388 - 0.3959	0.861111	0.357371	40.8889	0.12379	0.0516552		0.502099	0.5019 - 0.5023	0.907432	0.9071 - 0.9077	0.0111111	0.993086	31.5556	0.117862	0.0346019
Nearest Mean + WMW uncor.	0.538313	0.5364 - 0.5402	0.461552	0.4591 - 0.4641	0.845253	0.231373	49.5556	0.152711	0.071819		0.491777	0.4903 - 0.4932	0.483042	0.4816 - 0.4845	0.483025	0.500529	47.1111	0.147877	0.042488		0.614938	0.6137 - 0.6161	0.631042	0.6298 - 0.6323	0.552381	0.677496	84.6667	0.306741	0.11467		0.588164	0.5866 - 0.5897	0.356756	0.3527 - 0.3608	0.856667	0.31966	43.3333	0.135758	0.0494678		0.502593	0.5025 - 0.5027	0.90834	0.9081 - 0.9086	0.0111111	0.994074	42.8889	0.157466	0.0480297
Nearst Mean + ratio SumSq.	0.63227	0.6312 - 0.6334	0.656085	0.655 - 0.6571	0.529899	0.734641	49.1111	0.24276	0.0887629		0.4722	0.4702 - 0.4742	0.481852	0.4798 - 0.4839	0.560802	0.383598	57.5556	0.201702	0.054841		0.592817	0.5913 - 0.5943	0.62325	0.6219 - 0.6246	0.474603	0.711031	55.7778	0.202535	0.0828513		0.499454	0.4994 - 0.4995	0.928671	0.9285 - 0.9288	0	0.998907	26.8889	0.0907213	0.0441604		0.497053	0.497 - 0.4971	0.90745	0.9072 - 0.9077	0	0.994106	34.4444	0.129677	0.0604739
SVM + WMW	0.6935	0.6921 - 0.6949	0.651176	0.6499 - 0.6525	0.531313	0.724183	48.6667	0.220569	0.0972793		0.456081	0.4542 - 0.458	0.491759	0.4898 - 0.4937	0.625309	0.324868	51.5556	0.179722	0.0511087		0.650483	0.6486 - 0.6523	0.633697	0.6322 - 0.6352	0.469841	0.730556	70	0.255628	0.0961747		0.559312	0.5575 - 0.5611	0.839132	0.8381 - 0.8401	0.112222	0.8943	73.5556	0.286501	0.10334		0.499739	0.4976 - 0.5019	0.777231	0.7761 - 0.7783	0.1	0.842147	80.4444	0.308413	0.0989556
SVM + WMW uncor.	0.680683	0.6794 - 0.682	0.638066	0.6368 - 0.6393	0.550505	0.691503	43.7778	0.174296	0.0548295		0.440123	0.4381 - 0.4421	0.49209	0.4903 - 0.4939	0.615432	0.338095	45.7778	0.150816	0.0397146		0.653973	0.6522 - 0.6558	0.639039	0.6376 - 0.6405	0.479365	0.733333	68	0.253283	0.0920656		0.576114	0.574 - 0.5782	0.855607	0.8549 - 0.8563	0.104444	0.912792	71.7778	0.269223	0.0861009		0.525853	0.5241 - 0.5276	0.808593	0.8077 - 0.8095	0.125556	0.874053	68	0.263191	0.0827661
SVM + ratio SumSq.	0.682959	0.6817 - 0.6842	0.64177	0.6408 - 0.6427	0.514949	0.718954	45.5556	0.197694	0.088025		0.444044	0.4418 - 0.4463	0.49205	0.4898 - 0.4943	0.624691	0.327513	57.5556	0.189558	0.0570208		0.684092	0.6824 - 0.6857	0.655619	0.6545 - 0.6568	0.506349	0.743519	53.3333	0.19642	0.0800413		0.548681	0.5471 - 0.5503	0.844193	0.8435 - 0.8449	0.106667	0.900141	56.2222	0.229411	0.104943		0.492197	0.4902 - 0.4942	0.819054	0.8178 - 0.8203	0.0655556	0.890972	42.8889	0.160716	0.0738568
Average	0.62796		0.602646		0.561641	0.628105	48.237				0.463742		0.482265		0.565297	0.380456	54.7259				0.620359		0.621539		0.483036	0.703374	63.7778				0.543791		0.802684		0.189306	0.849308	49.6				0.509729		0.846331		0.0715972	0.920433	48.7556
max	0.693583		0.656085		0.855354	0.738562					0.505287		0.499193		0.655556	0.500529					0.684092		0.655619		0.557143	0.769887					0.609241		0.928671		0.861111	0.998907					0.556757		0.910627		0.193333	0.995631
Balance outcome	pCR		RD								pCR		RD								pCR		RD								pCR		RD								pCR		RD
	31		51								25		20								42		71								14		185								13		136
	0.378049		0.621951								0.555556		0.444444								0.371681		0.628319								0.0703518		0.929648								0.0872483		0.912752

## Sheet: affyst_all_(exprsData)
	Her2+ (n=82)										Her2 en ER - (n=45)										TN (n=113)										LUM (n=199)										LumA (n= 149)
	Scores						Features				Scores						Features				Scores						Features				Scores						Features				Scores						Features
	AUC	AUC-confidence	ACC	ACC-confidence	ACC-Pos	ACC-Neg	# selected	Stability outer loop	Stability inner loop		AUC	AUC-confidence	ACC	ACC-confidence	ACC-Pos	ACC-Neg	# selected	Stability outer loop	Stability inner loop		AUC	AUC-confidence	ACC	ACC-confidence	ACC-Pos	ACC-Neg	# selected	Stability outer loop	Stability inner loop		AUC	AUC-confidence	ACC	ACC-confidence	ACC-Pos	ACC-Neg	# selected	Stability outer loop	Stability inner loop		AUC	AUC-confidence	ACC	ACC-confidence	ACC-Pos	ACC-Neg	# selected	Stability outer loop	Stability inner loop
J48	0.534349	0.5171 - 0.5516	0.575655	0.5603 - 0.591	0.33841	0.723228					0.48033	0.446 - 0.5146	0.469608	0.4395 - 0.4997	0.352584	0.618023					0.557172	0.5431 - 0.5713	0.583335	0.5708 - 0.5958	0.427745	0.674472					0.521599	0.5027 - 0.5405	0.801283	0.7957 - 0.8069	0.204392	0.847035					0.512734	0.4981 - 0.5274	0.80839	0.8008 - 0.8159	0.148677	0.870277
Knn + WMW	0.610283	0.5835 - 0.637	0.620936	0.6011 - 0.6408	0.34358	0.796918					0.463324	0.4209 - 0.5057	0.46224	0.427 - 0.4975	0.372729	0.583867					0.592896	0.5761 - 0.6097	0.589552	0.5766 - 0.6025	0.474757	0.658569					0.561464	0.5446 - 0.5783	0.891429	0.8876 - 0.8953	0.0630159	0.953659					0.535062	0.5162 - 0.5539	0.898664	0.8924 - 0.9049	0.0442593	0.979515
Knn + WMW (uncor)	0.613353	0.5928 - 0.6339	0.61744	0.6011 - 0.6338	0.336173	0.791499					0.481773	0.4391 - 0.5244	0.462236	0.4286 - 0.4959	0.35852	0.607668					0.597512	0.5835 - 0.6115	0.593303	0.5795 - 0.6071	0.484473	0.656391					0.582234	0.5658 - 0.5986	0.885264	0.8809 - 0.8896	0.0804233	0.946296					0.553624	0.5369 - 0.5704	0.893206	0.8871 - 0.8993	0.0613228	0.971879
Knn + ratio SumSq.	0.58017	0.5596 - 0.6007	0.595143	0.5791 - 0.6112	0.240526	0.813561					0.452481	0.4175 - 0.4875	0.440461	0.4091 - 0.4719	0.261094	0.660016					0.579887	0.5659 - 0.5939	0.601647	0.5889 - 0.6144	0.418584	0.710186					0.546904	0.531 - 0.5629	0.894119	0.8906 - 0.8976	0.0445238	0.958036					0.539104	0.5153 - 0.5629	0.899626	0.8938 - 0.9055	0.0342857	0.980886
Lreg + WMW	0.688884	0.6677 - 0.7101	0.637637	0.6187 - 0.6566	0.3188	0.834046					0.512126	0.4733 - 0.5509	0.487029	0.4493 - 0.5247	0.363072	0.634698					0.672858	0.6578 - 0.6879	0.638714	0.6254 - 0.652	0.478724	0.733794					0.640503	0.6239 - 0.6571	0.908588	0.9051 - 0.912	0.0699471	0.971081					0.640003	0.6161 - 0.6639	0.911197	0.9052 - 0.9172	0.0653968	0.99184
Lreg + WMW uncor.	0.677833	0.6566 - 0.6991	0.631715	0.6134 - 0.6501	0.28406	0.846936					0.487147	0.4414 - 0.5329	0.481158	0.4524 - 0.5099	0.321705	0.677334					0.673877	0.6592 - 0.6886	0.635503	0.6211 - 0.6499	0.481136	0.728373					0.645181	0.6295 - 0.6608	0.907547	0.9044 - 0.9107	0.0639947	0.970365					0.643606	0.618 - 0.6692	0.910689	0.9044 - 0.917	0.0568783	0.991751
Lreg + ratio SumSq.	0.680684	0.6574 - 0.7039	0.618622	0.601 - 0.6363	0.257501	0.843438					0.513053	0.4737 - 0.5524	0.452331	0.412 - 0.4927	0.292882	0.669213					0.666463	0.6504 - 0.6825	0.638552	0.6246 - 0.6525	0.465818	0.739989					0.621565	0.6081 - 0.6351	0.905016	0.9013 - 0.9087	0.0478307	0.969302					0.634846	0.6125 - 0.6572	0.91248	0.9062 - 0.9188	0.0372487	0.995493
Naive Bayes + WMW	0.691542	0.6692 - 0.7139	0.66297	0.6438 - 0.6822	0.681046	0.65173					0.452126	0.407 - 0.4973	0.542	0.5092 - 0.5748	0.746211	0.290665					0.650409	0.6327 - 0.6681	0.532736	0.517 - 0.5485	0.858894	0.339284					0.657507	0.6428 - 0.6722	0.856072	0.8511 - 0.861	0.0700882	0.916146					0.680382	0.659 - 0.7018	0.894265	0.8869 - 0.9016	0.0806085	0.970566
Naive Bayes + WMW uncor.	0.685168	0.6639 - 0.7064	0.657591	0.6397 - 0.6755	0.668191	0.650316					0.445686	0.4031 - 0.4883	0.527389	0.4966 - 0.5582	0.721193	0.287005					0.654563	0.6364 - 0.6727	0.549069	0.5324 - 0.5657	0.863528	0.363299					0.6427	0.6283 - 0.6571	0.859911	0.8553 - 0.8645	0.0864374	0.91842					0.672044	0.6521 - 0.692	0.893585	0.8873 - 0.8999	0.0880159	0.968818
Naive Bayes + ratio SumSq.	0.690464	0.6681 - 0.7128	0.653941	0.6387 - 0.6692	0.648556	0.661774					0.450618	0.4063 - 0.495	0.52238	0.4968 - 0.548	0.723943	0.273725					0.666529	0.6497 - 0.6833	0.532515	0.5179 - 0.5471	0.835908	0.352013					0.66898	0.6574 - 0.6806	0.863499	0.8583 - 0.8687	0.0377778	0.926083					0.67119	0.651 - 0.6914	0.895001	0.8886 - 0.9014	0.0524603	0.974609
Nearest Mean + WMW	0.666502	0.6444 - 0.6886	0.661021	0.6398 - 0.6823	0.699751	0.633253					0.480136	0.4562 - 0.5041	0.51709	0.4848 - 0.5494	0.782447	0.177825					0.578899	0.5653 - 0.5925	0.497904	0.4806 - 0.5152	0.900272	0.257526					0.494123	0.4866 - 0.5016	0.865532	0.8606 - 0.8704	0.0611993	0.927046					0.521976	0.5144 - 0.5296	0.909473	0.9036 - 0.9153	0.0539418	0.990011
Nearest Mean + WMW uncor.	0.672327	0.6509 - 0.6938	0.663425	0.6439 - 0.6829	0.715096	0.629559					0.469206	0.4458 - 0.4926	0.503586	0.4718 - 0.5354	0.76661	0.171801					0.583562	0.5704 - 0.5967	0.501179	0.4851 - 0.5172	0.911542	0.255582					0.49859	0.4915 - 0.5057	0.868088	0.8636 - 0.8726	0.0682363	0.928944					0.521532	0.5132 - 0.5299	0.908053	0.9022 - 0.9139	0.0544709	0.988593
Nearst Mean + ratio SumSq.	0.6557	0.6351 - 0.6763	0.654122	0.6351 - 0.6731	0.664232	0.647169					0.479884	0.4535 - 0.5063	0.510809	0.4809 - 0.5407	0.749915	0.209852					0.584073	0.5701 - 0.598	0.507964	0.4919 - 0.524	0.886053	0.282092					0.49445	0.4879 - 0.501	0.8729	0.8683 - 0.8774	0.0540035	0.934897					0.517154	0.5105 - 0.5238	0.910543	0.9041 - 0.917	0.0418783	0.992431
SVM + WMW	0.662591	0.6414 - 0.6838	0.60685	0.59 - 0.6237	0.260456	0.820561					0.475294	0.4269 - 0.5237	0.441686	0.4087 - 0.4747	0.290133	0.631681					0.667286	0.6517 - 0.6829	0.629358	0.616 - 0.6427	0.492661	0.713282					0.656418	0.6438 - 0.669	0.90154	0.8978 - 0.9053	0.0606349	0.964495					0.636055	0.6148 - 0.6573	0.907149	0.9012 - 0.9131	0.051746	0.987552
SVM + WMW uncor.	0.666035	0.6457 - 0.6864	0.601693	0.5828 - 0.6205	0.257056	0.816526					0.472125	0.4271 - 0.5172	0.424097	0.3908 - 0.4574	0.285414	0.61893					0.652245	0.6362 - 0.6682	0.615062	0.6017 - 0.6285	0.47318	0.698506					0.649177	0.6368 - 0.6616	0.900262	0.8963 - 0.9042	0.0461376	0.964448					0.637557	0.6179 - 0.6572	0.910519	0.905 - 0.9161	0.0702116	0.990038
SVM + ratio SumSq.	0.656452	0.6312 - 0.6817	0.606345	0.5909 - 0.6218	0.280785	0.813786					0.478847	0.4318 - 0.5259	0.437278	0.4018 - 0.4728	0.288127	0.648119					0.668919	0.6558 - 0.6821	0.648242	0.6374 - 0.6591	0.501392	0.73656					0.645192	0.6287 - 0.6617	0.897274	0.8938 - 0.9007	0.0535097	0.96037					0.618654	0.5963 - 0.641	0.907954	0.9021 - 0.9138	0.0862169	0.985074
Average	0.652021		0.629069		0.437139	0.748394	#DIV/0!				0.474635		0.480086		0.479786	0.485026	#DIV/0!				0.627947		0.580915		0.622167	0.556245	#DIV/0!				0.595412		0.879895		0.0695095	0.941039	#DIV/0!				0.59597		0.898175		0.0642262	0.976833	#DIV/0!
max	0.691542		0.663425		0.715096	0.846936					0.513053		0.542		0.782447	0.677334					0.673877		0.648242		0.911542	0.739989					0.66898		0.908588		0.204392	0.971081					0.680382		0.91248		0.148677	0.995493
Balance outcome	pCR		RD								pCR		RD								pCR		RD								pCR		RD								pCR		RD
	31		51								25		20								42		71								14		185								13		136
	0.378049		0.621951								0.555556		0.444444								0.371681		0.628319								0.0703518		0.929648								0.0872483		0.912752
